# Supplementary material for: Senolytics improve bone forming potential of bone marrow mesenchymal stem cells from aged mice
Source: PubMed Central journal article supplement (PMC8195980; doi:10.1038/s41536-021-00145-z), 2021-06-11
Supplement: 41536_2021_145_MOESM1_ESM.pdf [file 41536_2021_145_MOESM1_ESM.pdf]

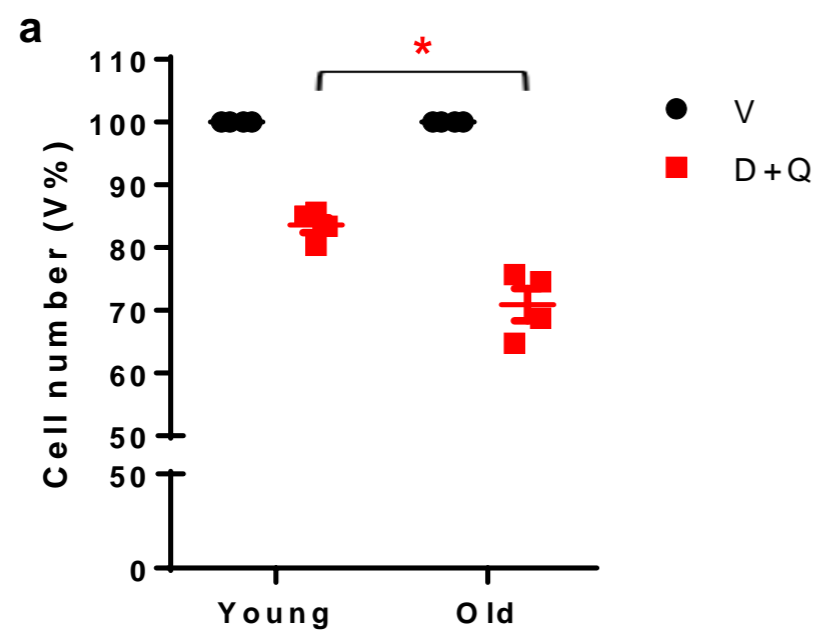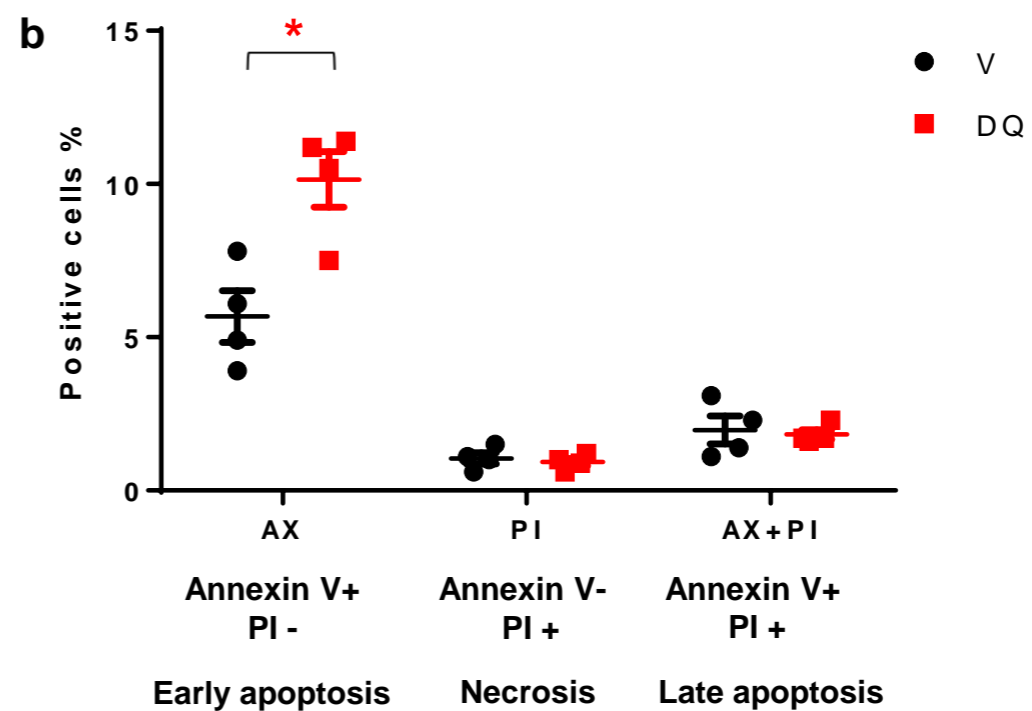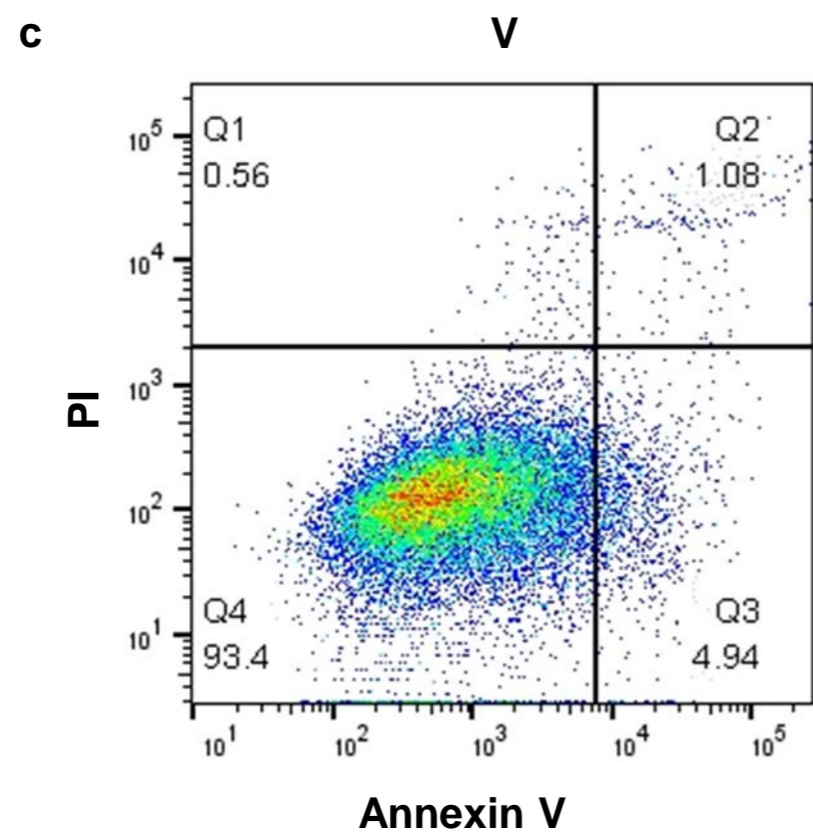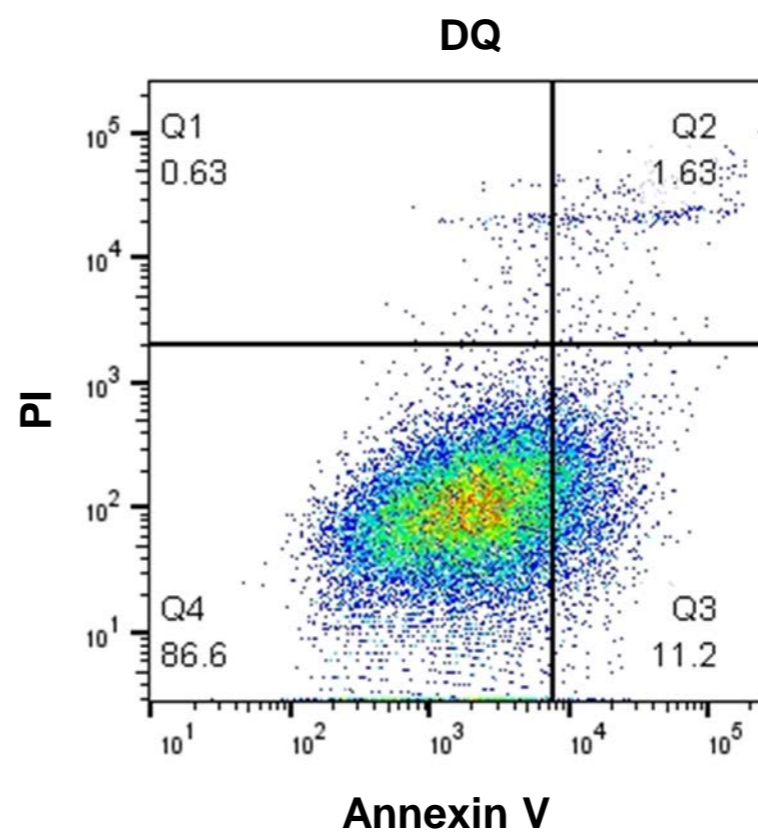

**Supplementary Figure 1. D+Q killed senescent cells through apoptosis.** (a) Cell counts of young and Old V or DQ treated BMSCs. n=4 for both groups. (b) Percentage of Annexin V positive, PI positive and double positive cells. n=4 for both groups. (c) Representative images of FACS analysis on Annexin V and PI staining. Results were shown as means  $\pm$  s.e.m. \*, p <0.05; two-tailed Student's t-test.

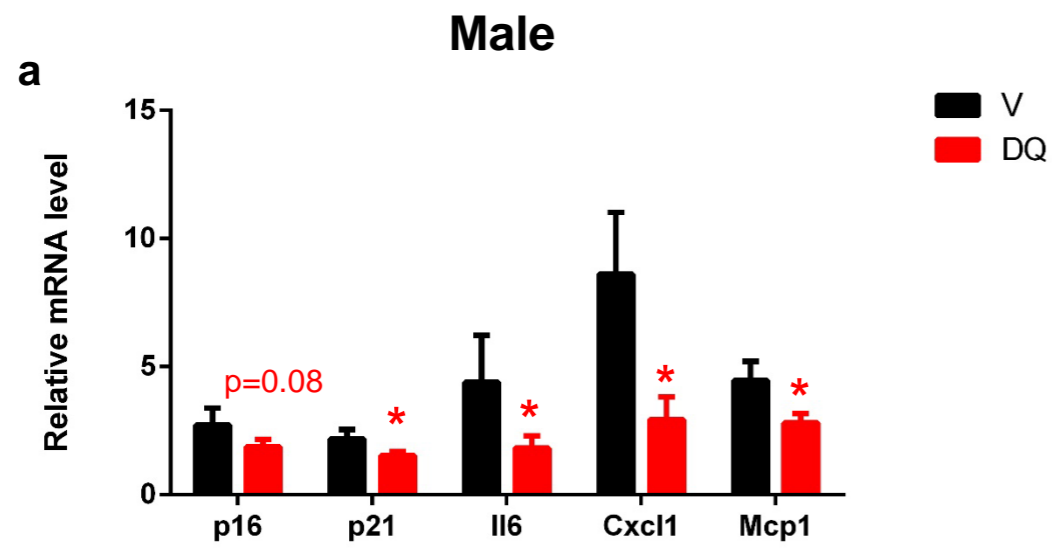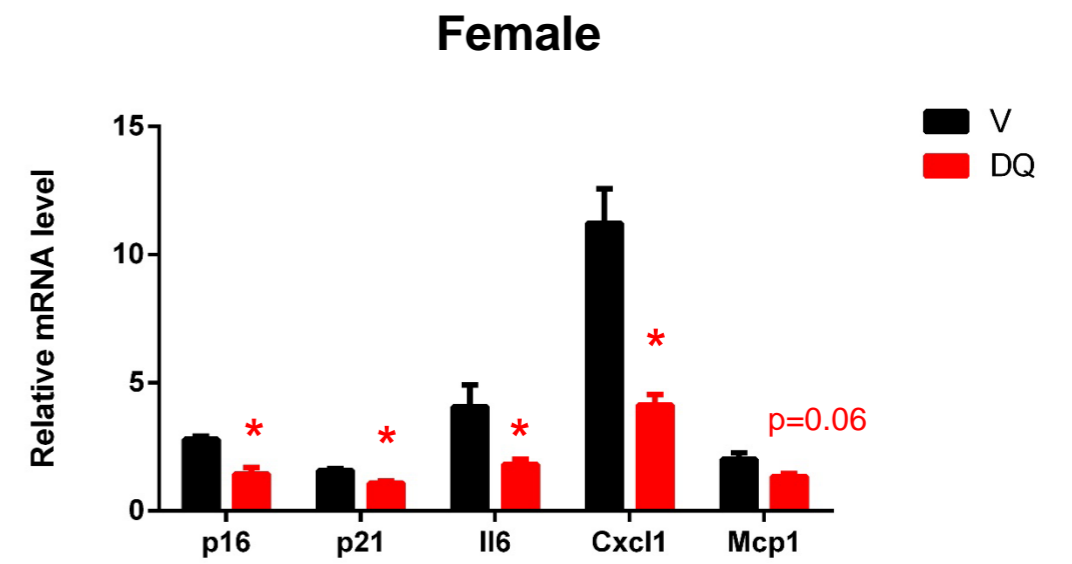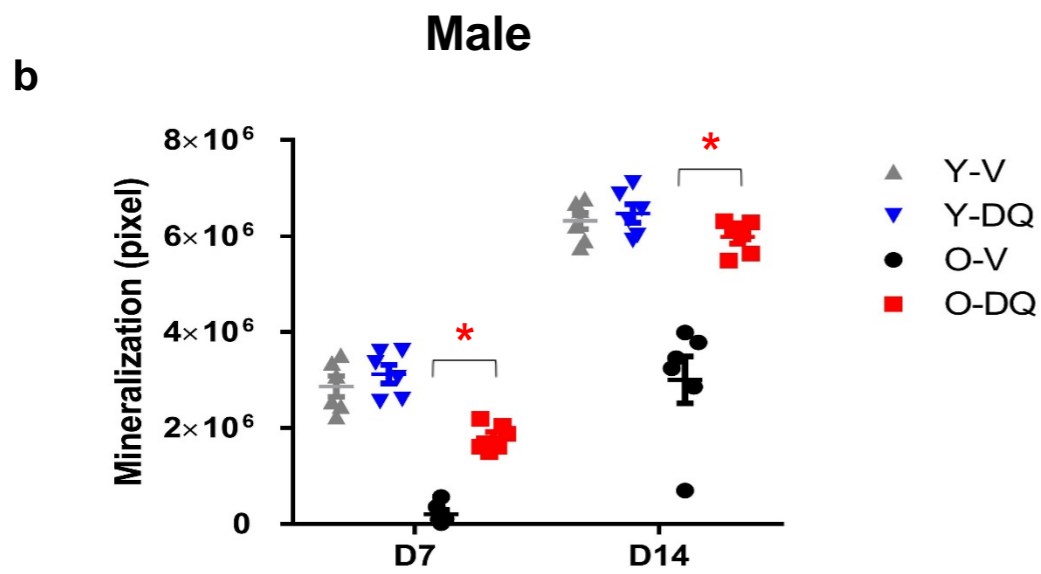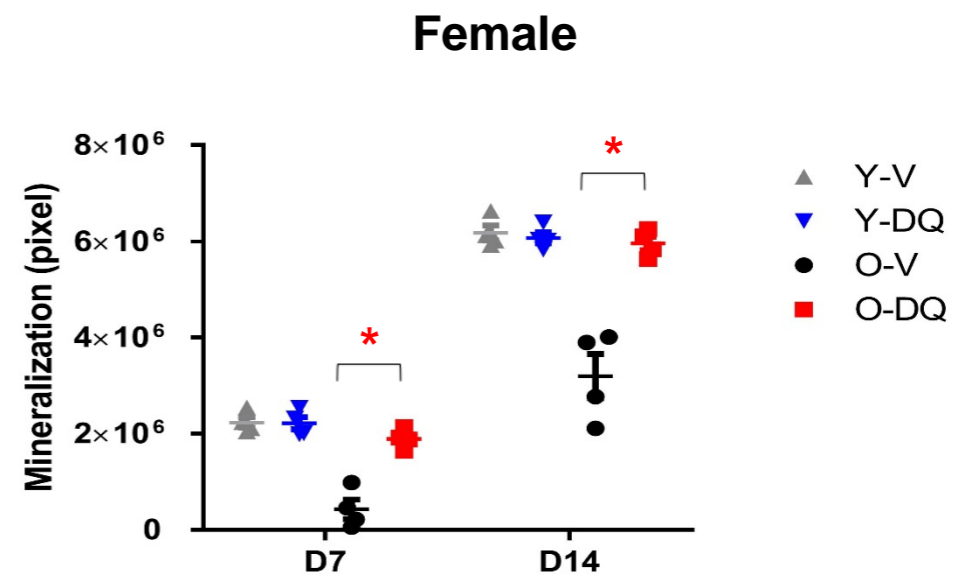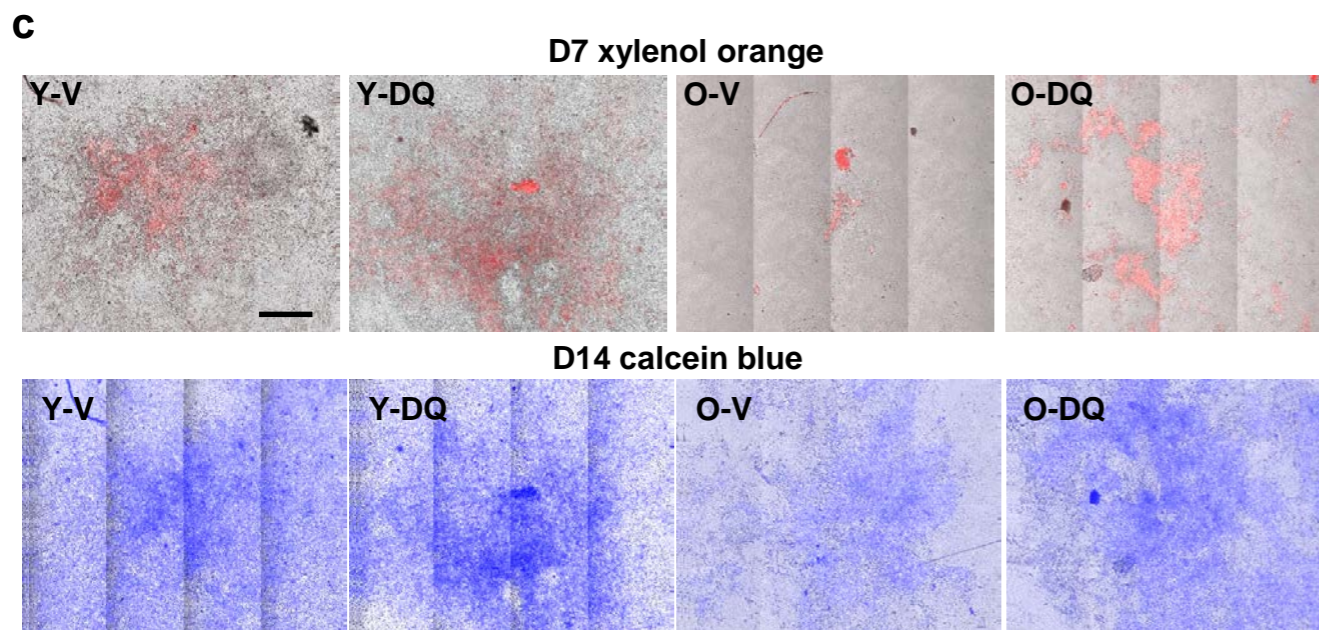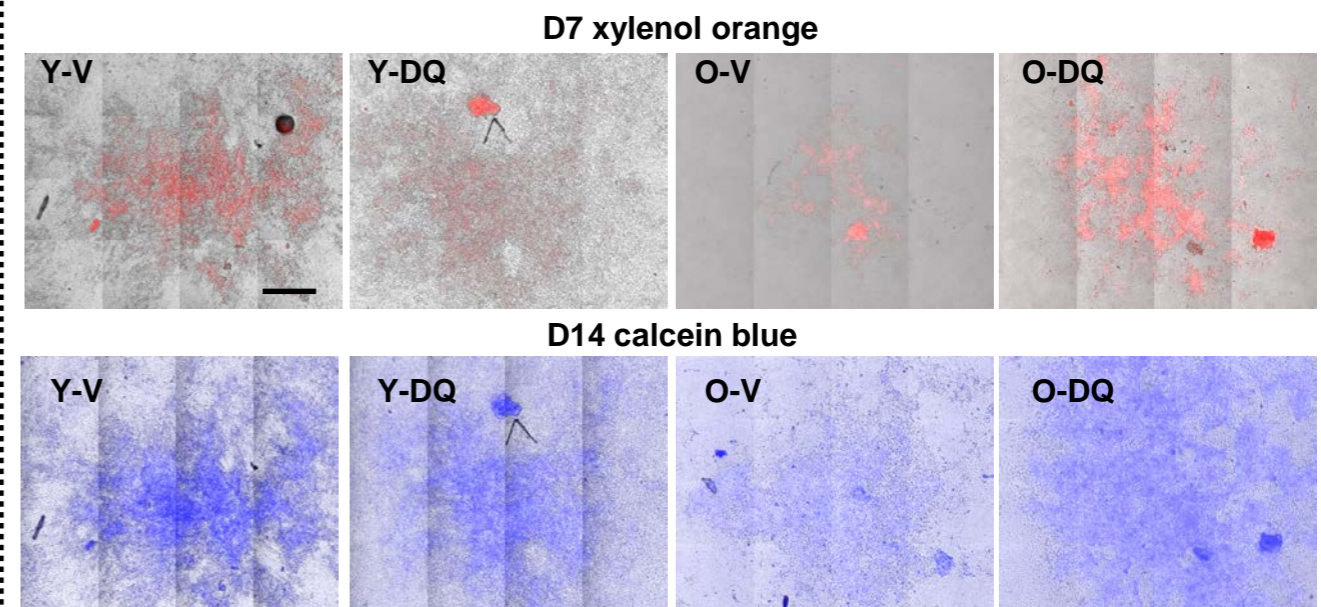

**Supplementary Figure 2. D+Q reduced senescence and improved osteogenic capacity of old BMSCs from both male and female donors.** (a) Expression of p16, p21, Il6, Cxcl1, MCP1 was analyzed by real-time PCR at day 0 for BMSCs from old male and female mice. n=6 for male and n=4 for female donors. (b) Old V or DQ treated BMSCs were differentiated in osteogenic media. The same wells were stained with xylenol orange at day 7 and calcein blue at day 14 to quantify the mineralization area at both time points. n=6 for male and n=4 for female donors. (c) Representative images of xylenol orange staining and calcein blue staining. Results were shown as means  $\pm$  s.e.m. \*,  $p < 0.05$ ; two-tailed Student's t-test. Scale bar: 500um

### Primer sequence information

| Gene  | Catalog Number     |          | Sequence                                                    |
|-------|--------------------|----------|-------------------------------------------------------------|
| TBP   | Mm.PT.39a.22214839 | Probe    | /56-FAM/ACT TGA CCT /ZEN/AAA GAC CAT TGC ACT TCG T/3IABkFQ/ |
|       |                    | Primer-1 | TGT ATC TAC CGT GAA TCT TGG C                               |
|       |                    | Primer-2 | CCA GAA CTG AAA ATC AAC GCA G                               |
| IL6   | Mm.PT.58.10005566  | Probe    | /56-FAM/CCT ACC CCA /ZEN/ATT TCC AAT GCT CTC CT/3IABkFQ/    |
|       |                    | Primer-1 | AGC CAG AGT CCT TCA GAG A                                   |
|       |                    | Primer-2 | TCC TTA GCC ACT CCT TCT GT                                  |
| p16   | Mm.PT.58.8388138   | Probe    | /56-FAM/CGC ACC GGA /ZEN/ATC CTG GAC CA/3IABkFQ/            |
|       |                    | Primer-1 | TGT TGT TGA GGC TAG AGA GGA                                 |
|       |                    | Primer-2 | AAT CTG CAC CGT AGT TGA GC                                  |
| p21   | Mm.PT.58.17125846  | Probe    | /56-FAM/TTC AGA GCC /ZEN/ACA GGC ACC ATG T/3IABkFQ/         |
|       |                    | Primer-1 | CAG ATC CAC AGC GAT ATC CAG                                 |
|       |                    | Primer-2 | GAA GAG ACA ACG GCA CAC T                                   |
| Cxcl1 | Mm.PT.58.42076891  | Probe    | /56-FAM/AGG TGT CCC /ZEN/CAA GTA ACG GAG AAA GA/3IABkFQ/    |
|       |                    | Primer-1 | CCA AAC CGA AGT CAT AGC CA                                  |
|       |                    | Primer-2 | GTG CCA TCA GAG CAG TCT                                     |
| Mcp1  | Mm.PT.58.42151692  | Probe    | /56-FAM/ACT CAC CTG /ZEN/CTG CTA CTC ATT CAC C/3IABkFQ/     |
|       |                    | Primer-1 | CAT CCA CGT GTT GGC TCA                                     |
|       |                    | Primer-2 | AAC TAC AGC TTC TTT GGG ACA                                 |
| Bglap | Mm.PT.58.9119501.g | Probe    | CCCAGACCTAGCAGACACCATGAG                                    |
|       |                    | Primer-1 | AGCAGAGTGAGCAGAAAGATG                                       |
|       |                    | Primer-2 | GAACAGACAAGTCCCACACAG                                       |
| Ibsp  | Mm.PT.58.29341883  | Probe    | ATGAAGACCAGGAGGCGGAGG                                       |
|       |                    | Primer-1 | GAGAGTGTGGAAAGTGTGGAG                                       |
|       |                    | Primer-2 | AGAAAATGGAGACGGCGATAG                                       |
